# Supplementary material for: Flexible Textile-Based Pressure Sensing System Applied in the Operating Room for Pressure Injury Monitoring of Cardiac Operation Patients
Source: PubMed Central journal article supplement (PMC7472060; doi:10.3390/s20164619), 2020-08-17
Supplement: sensors-20-04619-s001.pdf [file sensors-20-04619-s001.pdf]

Article

# Flexible Textile-Based Pressure Sensing System Applied in the Operating Room for Pressure Injury Monitoring of Cardiac Operation Patients

De-Fen Shih <sup>1,†</sup>, Jyh-Liang Wang <sup>1,2,†</sup>, Sou-Chih Chao <sup>1,2</sup>, Yin-Fa Chen <sup>3</sup>, Kuo-Sheng Liu <sup>4</sup>, Yi-Shan Chiang <sup>5</sup>, Chi Wang <sup>5,6</sup>, Min-Yu Chang <sup>5,7</sup>, Shu-Ling Yeh <sup>5,8</sup>, Pao-Hsien Chu <sup>9</sup>, Chao-Sung Lai <sup>10,11,12,13</sup>, Der-Chi Shye <sup>1,2</sup>, Lun-Hui Ho <sup>5,8,\*</sup> and Chia-Ming Yang <sup>3,10,11,14</sup>

<sup>1</sup> eBio Technology Inc., Xinzhuang, New Taipei City 242, Taiwan; stephanie@ebio-health.com (D.-F.S.); joewang@mail.mcut.edu.tw (J.-L.W.); willson@ebio-health.com (S.-C.C.); DCS19680323@gmail.com (D.-C.S.)

<sup>2</sup> Department of Electronic Engineering, Ming Chi University of Technology, New Taipei 243, Taiwan

<sup>3</sup> Institute of Electro-Optical Engineering, Chang Gung University, Taoyuan 333, Taiwan; chenbearfa@gmail.com (Y.-F.C.); cmyang@mail.cgu.edu.tw (C.-M.Y.)

<sup>4</sup> Department of Cardiac Surgery, Chang Gung Memorial Hospital, Linkou 333, Taiwan; liuks@me.com

<sup>5</sup> Department of Nursing, Linkou Chang Gung Memorial Hospital, Linkou 333, Taiwan; robelaec@cgmh.org.tw (Y.-S.C.); gigy@cgmh.org.tw (C.W.); yu@cgmh.org.tw (M.-Y.C.); q22122@cgmh.org.tw (S.-L.Y.)

<sup>6</sup> Department of Nursing, Chang Gung University, Taoyuan 333, Taiwan

<sup>7</sup> Department of Nursing, Oriental Institute of Technology, New Taipei City 220, Taiwan

<sup>8</sup> Department of Nursing, Chang Gung University of Science and Technology, Taoyuan 333, Taiwan

<sup>9</sup> Department of Cardiology, Chang Gung Memorial Hospital, School of Medicine, Chang Gung University, 199 Tung Hwa North Road, Taipei 105, Taiwan; pchu@cgmh.org.tw

<sup>10</sup> Department of Electronic Engineering, Chang-Gung University, Taoyuan 333, Taiwan; cslai@mail.cgu.edu.tw

<sup>11</sup> Biosensor Group, Biomedical Engineering Research Center, Chang Gung University, Taoyuan 333, Taiwan

<sup>12</sup> Department of Nephrology, Chang Gung Memorial Hospital, Linkou 333, Taiwan

<sup>13</sup> Department of Materials Engineering, Ming-Chi University of Technology, New Taipei City 243, Taiwan

<sup>14</sup> Department of General Surgery, Chang Gung Memorial Hospital, Linkou 333, Taiwan

\* Correspondence: ho1180@cgmh.org.tw; Tel: +886-3-3281200 (ext. 2811)

† D.-F. Shih and J.-L. Wang contributed equally to this work.

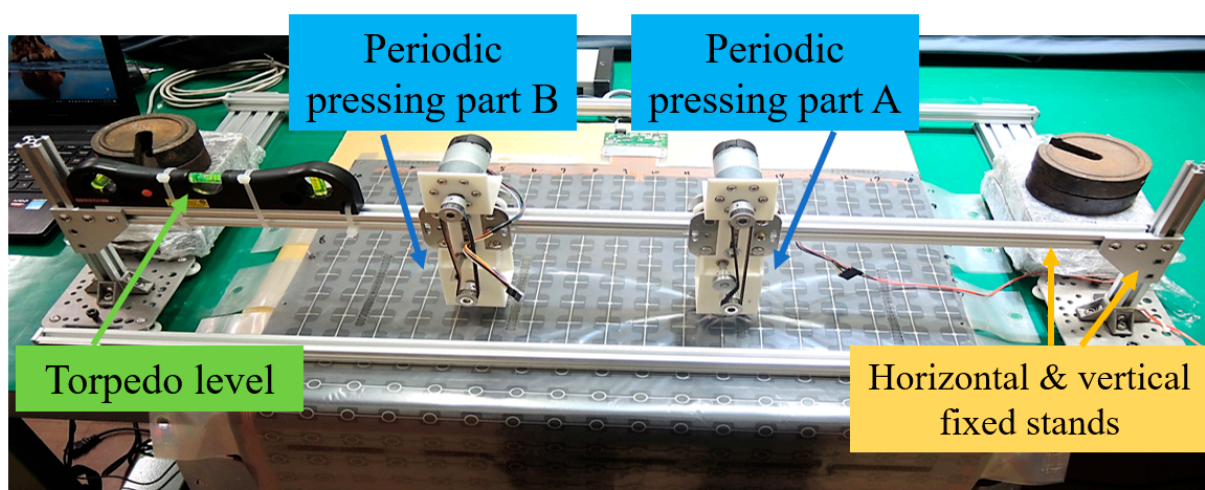

**Figure 1.** Picture of a regular pressing force by the mechanical setup for the single-pressure sensor.

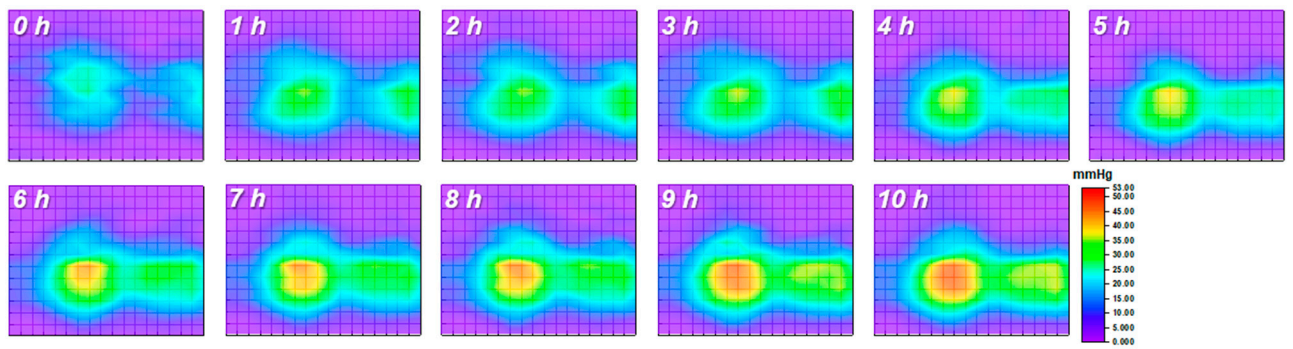

**Figure 2.** Time-dependent 2D pressure image for a typical patient with low BMI and without pressure injury.

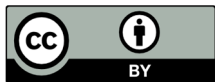

© 2020 by the authors. Licensee MDPI, Basel, Switzerland. This article is an open access article distributed under the terms and conditions of the Creative Commons Attribution (CC BY) license (<http://creativecommons.org/licenses/by/4.0/>).
